# Microform and Imaging Review

- Print run:** 2000 copies
- Printing process:** Offset
- Druckunterlagen:** Positive films or a printable high end pdf-file (at least 600 dpi, use integrated type – no TrueType, but solely postscript types), graphic design and type-setting are free of charge
- Dates of publication:** 4 issues per year, March, June, September and December of the current year
- Copy deadlines:** February, May, August and November of the current year
- Format of the journal:** 215 mm height x 278 mm width, plus 3 mm of bleed difference, without extra charge.

## Advertising rates:

| <b>format</b>                        | <b>Type area<br/>Height x Width</b> | <b>Price in €<br/>b /w</b> | <b>Price in €<br/>4 colour print</b> |
|--------------------------------------|-------------------------------------|----------------------------|--------------------------------------|
| <b>Full page</b>                     | 181 mm x 250 mm                     | 550,-                      | 1.000,-                              |
| <b>Half page (horizontal)</b>        | 181 mm x 120 mm                     | 350,-                      | 800,-                                |
| <b>Half page (vertical)</b>          | 86 mm x 250 mm                      | 350,-                      | 800,-                                |
| <b>Quarter page<br/>(horizontal)</b> | 181 mm x 60 mm                      | 230,-                      | 680,-                                |
| <b>Quarter page (vertical)</b>       | 86 mm x 120 mm                      | 230,-                      | 680,-                                |
| <b>2nd, 3rd, 4th Cover page</b>      | 181 mm x 250 mm                     | -----                      | 1.200,-                              |

- Series discounts:** Discounts for several inserations, after consultation
- Inserts/Einhefter:** on request
- Terms of payment:** net - on receipt of invoice
- Payment practice:** by arrangement
- Miscellaneous:** The publisher reserves the right to refuse advertisements. Our General Terms and Conditions apply.
- Orders and requiries to:** Media-Agentur Schaefer  
Frau Dr. Frauke Schaefer  
Inselstraße 20, D-04103 Leipzig  
Tel.: ++49 341/30 10 620  
Fax: ++49 341/30 10 621  
info@media-schaefer.de  
www.media-schaefer.de  
**für den**  
K. G. Saur Verlag  
Ein Imprint der WALTER DE GRUYTER GMBH & CO. KG  
Mies-van-der-Rohe-Straße 1, 80807 München
